# Supplementary material for: Cytotoxicity and Chemotaxonomic Significance of Saponins from Wild and Cultured Asparagus Shoots
Source: Preprints.org preprint supplement (doi:10.20944/preprints202406.0696.v1), 2024-06-11
Supplement: Supplementary file 1 [file supplementary]

Supplementary Tables of the article:

**Cytotoxicity and Chemotaxonomic Significance of Saponins from Wild and Cultured *Asparagus* Shoots**

| **Supplemental Table 1**. Saponin profiles of wild *Asparagus* shoots (individual saponin% of total saponin area reported by the LC-MS system) a | | | | | | | | | | | | | | | | | | | | | | | |
| --- | --- | --- | --- | --- | --- | --- | --- | --- | --- | --- | --- | --- | --- | --- | --- | --- | --- | --- | --- | --- | --- | --- | --- |
|  |  | ***A. Acutifolius*** | | | | ***A. albus*** | | | | | ***A. aphyllus*** | | | | ***A. horridus*** | | | | | | ***A. officinalis*** | | |
| **CAS number** | **Common name** | **AC1** | **AC2** | **AC3** | **Mean** | **AL1** | **AL2** | **AL3** | **AL4** | **Mean** | **AP1** | **AP2** | **AP3** | **Mean** | **H1** | **H2** | **H3** | **H4** | **H5** | **Mean** | **O1** | **O2** | **Mean** |
| 1494664-30-0 | 25-epi-officinalisnin II | n.d. | n.d. | 0.48±0.56b | 0.16±0.27B | 3.26±1.00a | 1.25±0.95ab | 3.30±1.09a | 3.42±1.07a | 2.81±1.04A | n.d. | n.d. | n.d. | n.d. | 2.64±0.80a | 1.20±1.76ab | 3.77±1.98a | 0.89±1.45b | 0.98±1.66b | 1.9±1.26A | 1.45±1.38ab | 4.13±3.09a | 2.79±1.90A |
| 89590-92-1 | Asp VI | n.d. | n.d. | n.d. | n.d. | n.d. | n.d. | n.d. | n.d. | n.d. | 3.07±1.09a | 4.51±1.05a | 3.36±1.65a | 3.65±0.76A | n.d. | n.d. | 0.50±1.78c | n.d. | n.d. | 0.10±1.04C | 1.56±1.99b | 1.15±1.09bc | 1.36±0.29B |
| 2417238-29-8 | Aspacochinoside L | n.d. | n.d. | 2.09±0.76c,d | 0.70±1.61C | 4.39±1.90bc | 6.06±1.75a | 5.64±2.04ab | 3.71±1.96bc | 4.96±1.13A | n.d. | n.d. | n.d. | n.d. | 2.64±1.76c | 3.93±1.78bc | 8.77±3.53a | 2.34±1.08cd | 0.98±1.80d | 3.73±3.00AB | 0.86±1.56d | 2.45±1.77cd | 1.66±1.44B |
| 557769-32-1 | Aspacochioside A | 9.02±2.09a | 2.18±1.41cd | 10.9±2.09a | 7.37±4.59A | 1.91±0.43cd | 3.95±1.17b | 1.91±1.68cd | 2.14±1.45cd | 2.48±0.99C | n.d. | n.d. | n.d. | n.d. | n.d. | 1.81±1.40cd | n.d. | 3.76±2.90bc | n.d. | 1.11±1.67C | 7.39±2.08a | 1.2±1.77d | 4.29±4.37B |
| 927890-95-7 | Aspacochioside A isomer | 9.02±1.99a | 13.8±1.45a | 10.9±2.99a | 11.24±2.41A | 1.91±1.90bc | 4.95±2.01b | 1.91±1.53bc | 2.14±0.77b | 2.73±1.48BC | n.d. | n.d. | n.d. | n.d. | 1.55±1.89c | 1.81±2.09c | n.d. | 3.76±1.06bc | 1.58±3.02c | 1.74±1.34C | 4.39±1.55b | 2.45±1.39bc | 3.42±1.37B |
| 1351930-52-3 | Aspacochioside D | 14.95±3.09b | 17.6±3.98ab | 18.8±2.99ab | 17.12±1.97A | n.d. | 5.60±1.80d | n.d. | n.d. | 1.40±2.80B | n.d. | n.d. | n.d. | n.d. | 10.61±2.67b | 13.39±4.08b | 6.90±2.04cd | 20.98±3.07a | 9.77±3.06bc | 12.33±5.36A | n.d. | n.d. | n.d. |
| 2417238-30-1 | Aspacochioside M | 14.39±2.08a | 5.25±0.99b | 4.76±1.87b | 8.13±5.43A | n.d. | n.d. | n.d. | n.d. | n.d. | n.d. | n.d. | n.d. | n.d. | n.d. | 4.41±2.76bc | n.d. | 2.17±1.90c | n.d. | 1.32±1.97C | 2.45±1.77c | 6.79±3.99b | 4.62±3.07BC |
| 131123-74-5 | Aspafilioside C | n.d. | n.d. | n.d. | n.d. | n.d. | n.d. | n.d. | n.d. | n.d. | n.d. | n.d. | n.d. | n.d. | 1.25±1.60 | 1.61±1.16 | 0.55±1.73 | 3.96±2.40 | 1.58±2.09 | 1.79±1.29 | n.d. | n.d. | n.d. |
| 117457-34-8 | Aspafurostanol I | 14.97±2.87a | 17.69±2.22a | 18.77±3.09a | 17.14±1.96A | n.d. | n.d. | n.d. | n.d. | n.d. | n.d. | n.d. | n.d. | n.d. | 3.26±3.05bc | 3.90±1.84b | 1.74±0.88c | 4.23±1.88b | 1.04±1.77c | 2.83±1.38B | n.d. | n.d. | n.d. |
| 270926-87-9 | Aspafurostanol II | n.d. | 0.12±0.15e | n.d. | 0.04±0.07E | 17.13±3.21b | 17.36±2.09b | 22.63±2.08a | 10.32±2.05c | 16.86±5.05B | 18.34±3.23ab | 22.04±3.65a | 22.15±3.09a | 20.84±2.17A | 7.30±2.09c | 9.54±3.08c | 3.15±1.77d | 16.75±3.67b | 8.64±2.88c | 9.08±4.94C | 8.39±2.75c | 1.34±1.44d | 4.86±4.98D |
| 185432-00-2 | Aspafurostanol III | n.d. | n.d. | n.d. | n.d. | n.d. | n.d. | n.d. | n.d. | n.d. | n.d. | n.d. | n.d. | n.d. | n.d. | 1.40±1.87a | n.d. | n.d. | n.d. | 0.28±0.63A | n.d. | n.d. | n.d. |
| 1193356-76-1 | Aspafurostanol IV: | n.d. | n.d. | n.d. | n.d. | n.d. | n.d. | n.d. | n.d. | n.d. | n.d. | n.d. | n.d. | n.d. | n.d. | n.d. | n.d. | n.d. | n.d. | n.d. | n.d. | n.d. | n.d. |
| 244779-39-3 | Aspafurostanol V: | n.d. | n.d. | n.d. | n.d. | n.d. | n.d. | n.d. | n.d. | n.d. | n.d. | n.d. | n.d. | n.d. | n.d. | n.d. | n.d. | n.d. | n.d. | n.d. | n.d. | n.d. | n.d. |
| 664366-25-0 | Aspafurostanol VI | n.d. | n.d. | n.d. | n.d. | 2.82±1.82a | 2.29±1.04a | 2.46±1.77a | n.d. | 1.89±1.28 | n.d. | n.d. | n.d. | n.d. | n.d. | n.d. | n.d. | n.d. | n.d. | n.d. | n.d. | n.d. | n.d. |
| Unnasigned-03 | Aspafurostanol VII | n.d. | n.d. | n.d. | n.d. | n.d. | n.d. | n.d. | n.d. | n.d. | n.d. | n.d. | n.d. | n.d. | 5.50±2.00 | 12.03±3.75 | 12.08±3.65 | 5.42±2.43 | 7.02±2.44 | 8.41±3.39 | n.d. | n.d. | n.d. |
| 1399745-31-3 | Aspafurostanol VIII | n.d. | n.d. | n.d. | n.d. | n.d. | n.d. | n.d. | n.d. | n.d. | n.d. | n.d. | n.d. | n.d. | n.d. | n.d. | n.d. | n.d. | n.d. | n.d. | 5.92±1.40a | 7.34±2.86 a | 6.63±1.00A |
| Unnasigned-07 | Aspafurostanol IX | n.d. | n.d. | n.d. | n.d. | n.d. | n.d. | n.d. | n.d. | n.d. | n.d. | n.d. | n.d. | n.d. | n.d. | n.d. | n.d. | n.d. | n.d. | n.d. | 3.88±1.66a | 6.74±2.80a | 5.31±2.02A |
| Unnasigned-02 | Aspafurostanol X | n.d. | n.d. | n.d. | n.d. | n.d. | n.d. | n.d. | n.d. | n.d. | n.d. | n.d. | n.d. | n.d. | n.d. | n.d. | n.d. | n.d. | n.d. | n.d. | 6.95±2.87b | 12.30±2.92a | 9.63±3.78A |
| Unnasigned-04 | Aspafurostanol XI | n.d. | n.d. | n.d. | n.d. | n.d. | n.d. | n.d. | n.d. | n.d. | n.d. | n.d. | n.d. | n.d. | n.d. | n.d. | n.d. | n.d. | n.d. | n.d. | 6.90±2.77b | 13.96±3.99a | 10.43±4.99A |
| 1193356-84-1 | Aspafurostanol XI | n.d. | n.d. | n.d. | n.d. | n.d. | n.d. | n.d. | n.d. | n.d. | n.d. | n.d. | n.d. | n.d. | n.d. | n.d. | n.d. | n.d. | n.d. | n.d. | 2.85±1.39 a | 4.20±2.06a | 3.52±0.95A |
| 60267-26-7 | Asparagoside F | n.d. | n.d. | n.d. | n.d. | 5.16±2.88ab | 2.01±1.66bcd | 5.53±3.07ab | 3.21±2.60bc | 3.98±1.66A | n.d. | n.d. | n.d. | n.d. | 0.96±1.98d | 3.01±2.32bc | 8.89±2.66a | 2.43±1.80bc | 2.76±1.88bc | 3.61±3.11A | n.d. | 1.18±1.80cd | 0.59±0.83B |
| 60267-27-8 | Asparagoside G | n.d. | 1.26±0.05 | n.d. | 0.42±0.73 | n.d. | n.d. | n.d. | n.d. | n.d. | n.d. | n.d. | n.d. | n.d. | n.d. | n.d. | n.d. | n.d. | n.d. | n.d. | n.d. | n.d. | n.d. |
| 84633-34-1 | Asparanin B  (syn. shatavarin-IV) | 9.02±1.77a | 13.99±2.23a | 10.9±2.09a | 11.3±2.51A | 1.90±1.95b | n.d. | 1.91±1.12b | 2.14±1.69b | 1.49±1.00B | n.d. | n.d. | n.d. | n.d. | n.d. | n.d. | n.d. | n.d. | n.d. | n.d. | n.d. | n.d. | n.d. |
| 84633-36-3 | Asparoside B | 1.58±1.23a | 2.79±2.62a | 1.65±1.56a | 2.01±0.68A | 0.17±0.34b | 1.70±2.01a | 0.47±0.35b | 0.03±0.59b | 0.59±0.76B | n.d. | n.d. | n.d. | n.d. | n.d. | n.d. | n.d. | n.d. | n.d. | n.d. | 2.54±2.06 a | 3.00±1.80a | 2.77±0.33A |
| 1493828-40-2 | Asparoside B isomer | 1.58±1.76ab | 2.79±0.78a | 1.57±0.72ab | 1.98±0.70A | 0.17±0.31b | 1.70±0.71ab | 0.47±0.31b | 0.03±0.04b | 0.59±0.76B | n.d. | n.d. | n.d. | n.d. | n.d. | n.d. | n.d. | n.d. | n.d. | n.d. | 1.12±1.88b | 4.20±2.61ab | 2.66±2.18A |
| 868560-76-3 | Aspaspirostanoside I | 0.39±0.25c | 1.26±0.34b | 2.09±0.11a | 1.25±0.85A | n.d. | n.d. | n.d. | n.d. | n.d. | n.d. | n.d. | n.d. | n.d. | n.d. | n.d. | n.d. | n.d. | n.d. | n.d. | n.d. | n.d. | n.d. |
| Unnasigned-01 | Aspaspirostanoside II | 6.78±0.98b | 3.26±0.45c | 2.82±0.76c | 4.29±2.17A | n.d. | n.d. | n.d. | n.d. | n.d. | n.d. | n.d. | n.d. | n.d. | n.d. | 0.59±1.49d | 5.52±1.77bc | 1.00±1.43d | 10.54±3.00a | 3.53±4.49B | n.d. | n.d. | n.d. |
| 84633-33-0 | Aspaspirostanoside III | 11.09±1.99a | 11.35±2.09a | 6.68±1.90b | 9.71±2.63A | n.d. | n.d. | n.d. | n.d. | n.d. | n.d. | n.d. | n.d. | n.d. | n.d. | n.d. | n.d. | n.d. | n.d. | n.d. | n.d. | n.d. | n.d. |
| 346617-77-4 | Aspaspirostanoside IV | 0.66±0.23h | n.d. | n.d. | 0.22±0.38C | 38.8±3.99cd | 34.53±5.09d | 33.98±4.49d | 47.98±5.93b | 38.82±6.47 | 46.41±6.23b | 44.49±12.09b | 68.18±6.09a | 53.03±13.15A | 17.63±3.43e | 1.80±1.97g | 11.22±3.88f | 3.56±1.76g | 9.85±2.90f | 8.81±6.35B | n.d. | n.d. | n.d. |
| 84765-74-2 | Aspaspirostanoside V | n.d. | 0.16±1.03d | n.d. | 0.05±0.19B | 6.66±1.46a | 6.28±1.80a | 5.77±2.09ab | 8.52±2.78a | 6.81±1.20A | n.d. | 2.16±0.76cd | n.d. | 0.72±1.25B | 5.31±1.76b | 5.20±2.04bc | 2.34±0.59c | 2.93±1.48c | 5.85±3.98bc | 4.33±1.58A | 0.98±1.03d | n.d. | 0.49±0.70B |
| 1265882-67-4 | Aspaspirostanoside VI: | n.d. | n.d. | n.d. | n.d. | 0.78±1.77a | 0.67±1.09a | 0.41±1.96a | 1.07±1.08a | 0.73±0.27A | n.d. | n.d. | n.d. | n.d. | n.d. | 1.56±0.90a | n.d. | n.d. | n.d. | 0.31±0.70A | n.d. | n.d. | n.d. |
| 58881-26-8 | Aspaspirostanoside VII: | n.d. | n.d. | n.d. | n.d. | n.d. | n.d. | n.d. | n.d. | n.d. | n.d. | n.d. | n.d. | n.d. | n.d. | n.d. | 5.50±2.30 | n.d. | n.d. | 1.10±2.46 | n.d. | n.d. | n.d. |
| 1297292-56-8 | Coreajaponin B | n.d. | n.d. | n.d. | n.d. | n.d. | n.d. | n.d. | n.d. | n.d. | 3.9±1.08 | n.d. | n.d. | 1.30±2.25 | n.d. | n.d. | n.d. | n.d. | n.d. | n.d. | n.d. | n.d. | n.d. |
| 19057-60-4 | Dioscin | n.d. | n.d. | n.d. | n.d. | 0.92±1.09b | 1.08±1.31b | 0.38±1.48b | n.d. | 0.59±0.50B | n.d. | n.d. | n.d. | n.d. | n.d. | n.d. | n.d. | 0.66±1.99b | n.d. | 0.13±0.29B | 7.10±2.07a | 4.12±2.93a | 5.61±2.11A |
| 173356-79-1 | Filicinin A | n.d. | n.d. | n.d. | n.d. | n.d. | n.d. | n.d. | n.d. | n.d. | n.d. | n.d. | n.d. | n.d. | 18.28±4.56a | 4.40±1.55c | 9.34±2.00b | 6.87±1.05bc | 20.12±3.76a | 11.80±3.01 | n.d. | n.d. | n.d. |
| Unnasigned-05 | Isomer of Asp IV’ | n.d. | n.d. | n.d. | n.d. | 2.50±0.80bc | 6.28±2.09a | 2.14±1.87bc | 8.52±2.99a | 4.86±3.07A | n.d. | 1.78±1.00bc | n.d. | 0.59±1.03B | 5.31±1.89a | 5.20±3.09ab | 1.99±1.06bc | 2.93±1.30b | n.d. | 3.09±2.24A | 0.98±1.88c | n.d. | 0.49±0.70B |
| Unnasigned-06 | Isomer of asparagoside F | n.d. | n.d. | 0.48±1.56c | 0.16±0.27B | 5.76±2.08a | 1.96±1.34bc | 5.54±2.07ab | 3.42±1.95ab | 4.17±1.81A | n.d. | n.d. | n.d. | n.d. | 2.64±1.78bc | n.d. | n.d. | n.d. | n.d. | 0.53±1.78B | 2.12±1.63bc | 3.24±2.99abc | 2.68±0.79A |
| 54522-52-0 | Methyl protodioscin | n.d. | n.d. | n.d. | n.d. | n.d. | n.d. | n.d. | n.d. | n.d. | 3.15±1.19a | 1.25±1.17a | 1.98±1.65a | 2.13±0.96 | n.d. | n.d. | n.d. | n.d. | n.d. | n.d. | n.d. | n.d. | n.d. |
| 57944-19-1 | Officinalisnin-II | n.d. | n.d. | n.d. | n.d. | 5.76±2.00ab | 2.33±1.06bc | 5.54±1.96ab | 3.34±2.23bc | 4.24±1.68A | n.d. | n.d. | n.d. | n.d. | 1.34±1.64c | 4.23±1.44b | 8.99±3.05a | 2.27±1.56bc | 0.99±1.44c | 3.58±3.28AB | 0.89±1.20c | 3.33±2.98bc | 2.11±1.73B |
| 1383539-99-8 | Pallidifloside A | n.d. | n.d. | n.d. | n.d. | n.d. | n.d. | n.d. | n.d. | n.d. | n.d. | n.d. | n.d. | n.d. | 13.79±2.90ab | 18.99±4.56a | 9.07±3.00b | 13.11±3.66ab | 18.28±4.38a | 14.65±4.07A | n.d. | n.d. | n.d. |
| 55056-80-9 | Protodioscin | 1.13±1.77c | 1.15±1.43c | 1.33±1.65c | 1.20±0.11B | n.d. | n.d. | n.d. | n.d. | n.d. | 10.16±2.17a | 8.89±2.08ab | 1.14±0.89c | 6.73±4.88A | n.d. | n.d. | n.d. | n.d. | n.d. | n.d. | 6.76±3.40b | 3.45±2.01bc | 5.11±2.34A |
| 60478-69-5 | Protoneodioscin | 1.76±1.23bc | 1.42±1.23c | 1.66±1.45bc | 1.61±0.17B | n.d. | n.d. | n.d. | n.d. | n.d. | 5.22±1.87b | 5.19±1.87b | 1.96±1.06bc | 3.79±2.45AB | n.d. | n.d. | n.d. | n.d. | n.d. | n.d. | 9.21±2.88a | 2.23±1.94bc | 5.72±4.94A |
| 102115-79-7 | Pseudoprotodoioscin | 1.01±0.34b | 0.78±0.21b | 1.64±0.61b | 1.14±0.44B | n.d. | n.d. | n.d. | n.d. | n.d. | 4.89±1.67a | 5.45±1.78a | 1.15±1.70b | 3.83±2.34A | n.d. | n.d. | n.d. | n.d. | n.d. | n.d. | 5.90±1.48a | 4.56±2.81a | 5.23±0.95A |
| 117557-44-5 | Pseudoprotoneodioscin | 1.25±0.43c | 0.98±0.12c | 2.01±0.56bc | 1.41±0.53B | n.d. | n.d. | n.d. | n.d. | n.d. | 2.68±0.87bc | 3.69±1.88b | 1.08±1.01c | 2.48±1.31AB | n.d. | n.d. | n.d. | n.d. | n.d. | n.d. | 8.43±2.19a | 2.45±1.07b | 5.44±4.23A |
| 1374788-87-0 | Sarsaparilloside B | 1.39±1.25b | 2.15±1.11ab | n.d. | 1.18±1.09A | n.d. | n.d. | n.d. | n.d. | n.d. | n.d. | 0.56±1.79b | n.d. | 0.19±0.32B | n.d. | n.d. | n.d. | n.d. | n.d. | n.d. | 1.98±1.70b | 4.20±3.00a | 2.59±2.28A |
| 24332-93-2 | Δ20(22)-sarsaparilloside | n.d. | n.d. | n.d. | n.d. | n.d. | n.d. | n.d. | n.d. | n.d. | 2.17±0.63 | n.d. | n.d. | 0.72±1.25 | n.d. | n.d. | n.d. | n.d. | n.d. | n.d. | n.d. | n.d. | n.d. |
| aData represent means ± SD of samples analyzed in triplicate. Differences in saponin amounts were tested according to one-way ANOVA followed by Duncan’s test. Within a file, means followed by different lowercase letters are significantly different at p < 0.05, and means followed by capital letters represent the ANOVA test effected for mean values of species (p < 0.05). n.d., not detected. | | | | | | | | | | | | | | | | | | | | | | | |

| **Supplemental Table 2**. Saponins structures detected in the *Asparagus* shoots analized | | |
| --- | --- | --- |
| **Common Name** | **CAS number** | **Structure** |
| 25-epi-officinalisnin II | 1494664-30-0 |  |
| Aspacochinoside L | 2417238-29-8 |  |
| Aspacochinoside M | 2417238-30-1 |  |
| Aspacochioside A | 557769-32-1 |  |
| Aspacochioside D | 1351930-52-3 |  |
| Aspafilioside C | 131123-74-5 |  |
| Aspafurostanol I | 117457-34-8 |  |
| Aspafurostanol II | 270926-87-9 |  |
| Aspafurostanol III | 185432-00-2 |  |
| Aspafurostanol IV | 1193356-76-1 |  |
| Aspafurostanol V | 244779-39-3 |  |
| Aspafurostanol VI | 664366-25-0 |  |
| Aspafurostanol VII | Non-assigned-03 |  |
| Aspafurostanol VIII | 1399745-31-3 |  |
| Aspafurostanol IX | Non-assigned-07 |  |
| Aspafurostanol X | Non-assigned-02 |  |
| Aspafurostanol XI | 1193356-84-1 |  |
| Asparagoside F | 60267-26-7 |  |
| Asparagoside G | 60267-27-8 |  |
| Asparoside B  Asparoside B | 84633-36-3  ó  301643-62-9 |  |
| Aspaspirostanoside I | 868560-76-3 |  |
| Aspaspirostanoside II | Non-assigned-01 |  |
| Aspaspirostanoside III | 84633-33-0 |  |
| Aspaspirostanoside IV | 346617-77-4 |  |
| Aspaspirostanoside V | 84765-74-2 |  |
| Aspaspirostanoside VI | 1265882-67-4 |  |
| Aspaspirostanoside VII | 58881-26-8 |  |
| Coreajaponin B | 1297292-56-8 |  |
| Dioscin | 19057-60-4 |  |
| Filicinin A | 173356-79-1 |  |
| Isomer of Asp IV’ | Non-assigned-05 |  |
| Isomer of aspacochioside A | 927890-95-7 |  |
| Isomer of asparagoside F | Non-assigned-06 |  |
| Isomer of asparoside B | 1493828-40-2 |  |
| Methyl protodioscin | 54522-52-0 |  |
| Officinalisnin-II | 57944-19-1 |  |
| Pallidifloside A | 1383539-99-8 |  |
| Protodioscin | 55056-80-9 |  |
| Protoneodioscin | 60478-69-5 |  |
| Pseudoprotodioscin | 102115-79-7 |  |
| Pseudoprotoneodioscin | 117557-44-5 |  |
| Sarsaparilloside | 24333-07-1 |  |
| Sarsaparilloside B | 1374788-87-0 |  |
| Shatavarin-IV | 84633-34-1 |  |
| Δ20(22)-sarsaparilloside | 24332-93-2 |  |

| **Supplemental Table 3**. Data on saponins determination by LC-MS | | | | | | |
| --- | --- | --- | --- | --- | --- | --- |
| **CAS Number** | **Saponin name** | **Actual RT** | **Formula** | **Adduct** | ***m/z* (Expected)** | ***m/z* (Delta) ppm** |
| 84633-36-3 | Asparoside B | 10.37 | C51H86O23 | M+H | 10.495.527 | -159.555 |
| 1493828-40-2 | Asparoside B isomer | 10.37 | C51H86O23 | M+H | 10.495.527 | -159.555 |
| 1374788-87-0 | Sarsaparilloside B | 10.37 | C51H86O23 | M+H | 10.495.527 | -159.555 |
| 1383539-99-8 | Pallidifloside A | 10.62 | C50H80O21 | M+H | 10.175.264 | -201.171 |
| 2417238-30-1 | Aspacochinoside M | 10.65 | C45H74O19 | M+H | 9.014.791 | -125.759 |
| 1297292-56-8 | Coreajaponin B | 10.66 | C51H84O22 | M-H | 1.047.537 | -327.498 |
| 664366-25-0 | Aspafurostanol VI | 11.03 | C51H86O22 | M+H | 10.335.578 | -0.886 |
| 270926-87-9 | Aspafurostanol II | 11.31 | C50H84O22 | M+H | 10.195.421 | -0.944 |
| 131123-74-5 | Aspafilioside C | 12.3 | C45H74O17 | M+H | 8.874.999 | 0.319 |
| Unnasigned-05 | Isomer of Asp IV’ | 12.86 | C44H74O18 | M+H | 8.734.842 | -161.642 |
| 84765-74-2 | Aspaspirostanoside V | 12.99 | C44H72O17 | M+H | 8.734.842 | -245.492 |
| 173356-79-1 | Filicinin A | 16.15 | C50H82O22 | M-H | 10.335.214 | 102.653 |
| 346617-77-4 | Aspaspirostanoside IV | 17.06 | C39H62O12 | M+H | 7.114.314 | -172.078 |
| 868560-76-3 | Aspaspirostanoside I | 17.08 | C51H84O23 | M+H | 10.655.476 | -148.233 |
| 60267-27-8 | Asparagoside G | 17.7 | C51H86O24 | M+H | 10.655.476 | -148.233 |
| 1494664-30-0 | 25-epi-officinalisnin II | 17.7 | C51H86O24 | M+H | 10.655.476 | -148.233 |
| Unnasigned-06 | Isomer of asparagoside F | 18.4 | C50H82O22 | M+H | 10.355.371 | -175.916 |
| 2417238-29-8 | Aspacochinoside L | 18.4 | C50H84O23 | M+H | 10.355.371 | -175.916 |
| 60267-26-7 | Asparagoside F | 18.4 | C50H82O22 | M+H | 1.035.537 | -166.260 |
| 2417238-29-8 | Aspacochinoside L | 18.4 | C50H84O23 | M+H | 10.355.371 | -175.916 |
| 57944-19-1 | Officinalisnin-II | 18.4 | C50H84O23 | M+H | 1.035.537 | -166.260 |
| 89590-92-1 | Asp VI | 18.4 | C50H84O23 | M+H | 1.035.537 | -166.260 |
| 1265882-67-4 | Aspaspirostanoside VI: | 18.95 | C45H74O18 | M+H | 9.034.948 | -289.155 |
| 185432-00-2 | Aspafurostanol III | 18.95 | C45H74O18 | M+H | 9.034.948 | -289.155 |
| Unnasigned-03 | Aspafurostanol VII | 20.54 | C50H82O23 | M+H | 10.335.214 | -0.863 |
| Unnasigned-01 | Aspaspirostanoside II | 24.02 | C39H62O14 | M+H | 7.554.212 | -161.114 |
| 1193356-84-1 | Aspafurostanol XI | 24.32 | C51H86O23 | M+H | 10.495.527 | 0.382 |
| Unnasigned-07 | Aspafurostanol IX | 24.87 | C52H88O22 | M+H | 10.475.734 | 171.378 |
| 117457-34-8 | Aspafurostanol I | 25.62 | C45H72O17 | M+H | 8.854.842 | -180.130 |
| 1351930-52-3 | Aspacochioside D | 25.62 | C50H82O21 | M+H | 8.854.825 | 0.11856 |
| 55056-80-9 | Protodioscin | 25.65 | C51H84O22 | M+H | 10.315.421 | -176.124 |
| 60478-69-5 | Protoneodioscin | 25.65 | C51H84O22 | M+H | 10.315.421 | -176.124 |
| 102115-79-7 | Pseudoprotodoioscin | 25.65 | C51H82O21 | M+H | 10.315.421 | -176.124 |
| 117557-44-5 | Pseudoprotoneodioscin | 25.65 | C51H82O21 | M+H | 10.315.421 | -176.124 |
| 19057-60-4 | Dioscin | 25.98 | C45H72O16 | M+H | 8.694.893 | 0.583 |
| 557769-32-1 | Aspacochioside A | 25.99 | C45H76O18 | M+H | 8.874.998 | -197.535 |
| 927890-95-7 | Aspacochiosidc A isomer | 25.99 | C45H76O18 | M+H | 8.874.998 | -197.535 |
| 84633-34-1 | Asparanin B (syn. shatavarin-IV) | 25.99 | C45H74O17 | M+H | 8.874.999 | -208.803 |
| 58881-26-8 | Aspaspirostanoside VII: | 26.4 | C39H64O12 | M+H | 7.254.471 | -212.746 |
| 84633-33-0 | Aspaspirostanoside III | 26.99 | C39H64O13 | M+H | 7.414.419 | -223.000 |
| 24332-93-2 | Δ20(22)-sarsaparilloside | 29.89 | C51H86O22 | M-H | 10.495.527 | -206.077 |
| 54522-52-0 | Methyl protodioscin | 30.1 | C52H86O22 | M+H | 10.455.578 | 145.967 |
| 1399745-31-3 | Aspafurostanol VIII | 31.04 | C57H94O27 | M+H | 11.935.949 | 302.510 |
| Unnasigned-02 | Aspafurostanol X | 31.04 | C57H92O26 | M+H | 11.935.949 | 302.510 |
| Unnasigned-04 | Aspafurostanol XI | 31.04 | C57H92O26 | M+H | 11.935.949 | 302.510 |
|  | | | | | | |
